# Supplementary material for: Development and verification of the PAM50-based Prosigna breast cancer gene signature assay
Source: PubMed Central journal article supplement (PMC4546262; doi:10.1186/s12920-015-0129-6), 2015-08-22

**ROR-S**

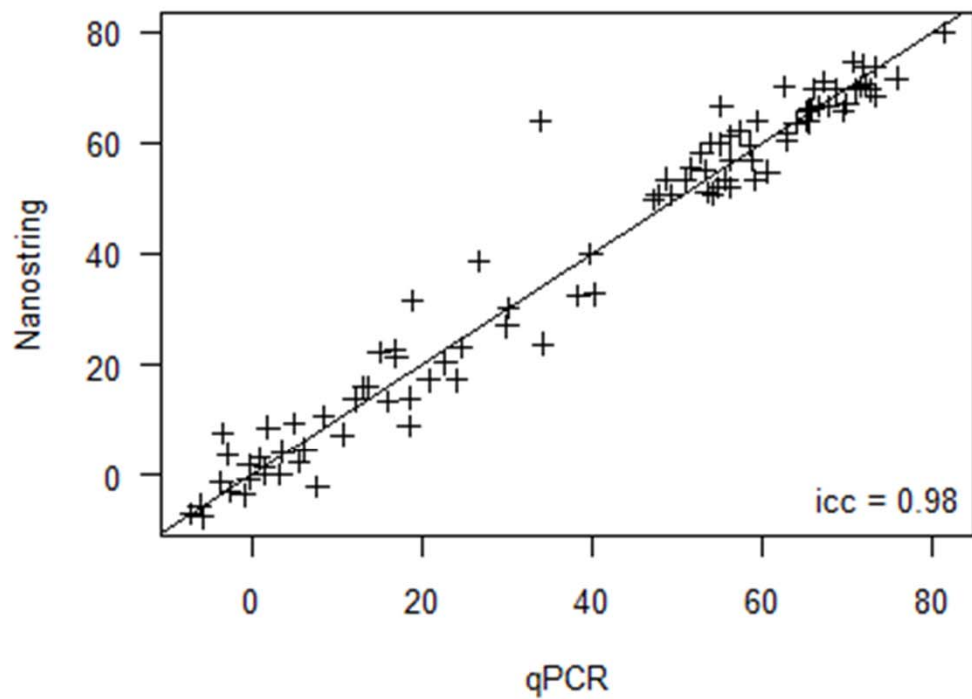

**Proliferation Score**

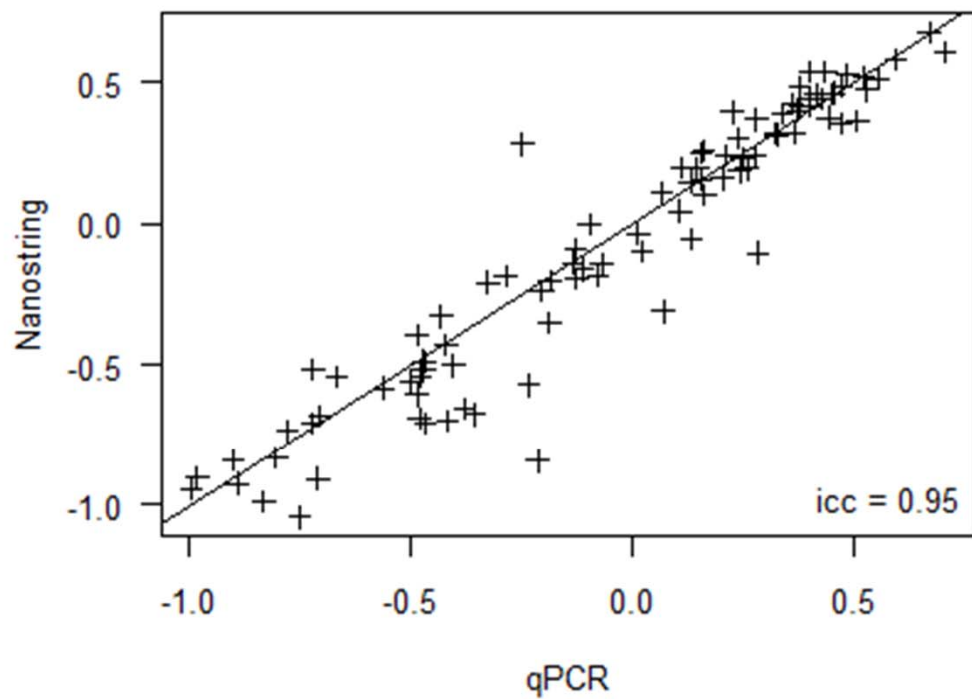

Supplement: 12920_2015_129_MOESM5_ESM.pdf [file 12920_2015_129_MOESM5_ESM.pdf]
