# Supplementary material for: Development and verification of the PAM50-based Prosigna breast cancer gene signature assay
Source: PubMed Central journal article supplement (PMC4546262; doi:10.1186/s12920-015-0129-6), 2015-08-22
Supplement: 12920_2015_129_MOESM7_ESM.pdf [file 12920_2015_129_MOESM7_ESM.pdf]

A.

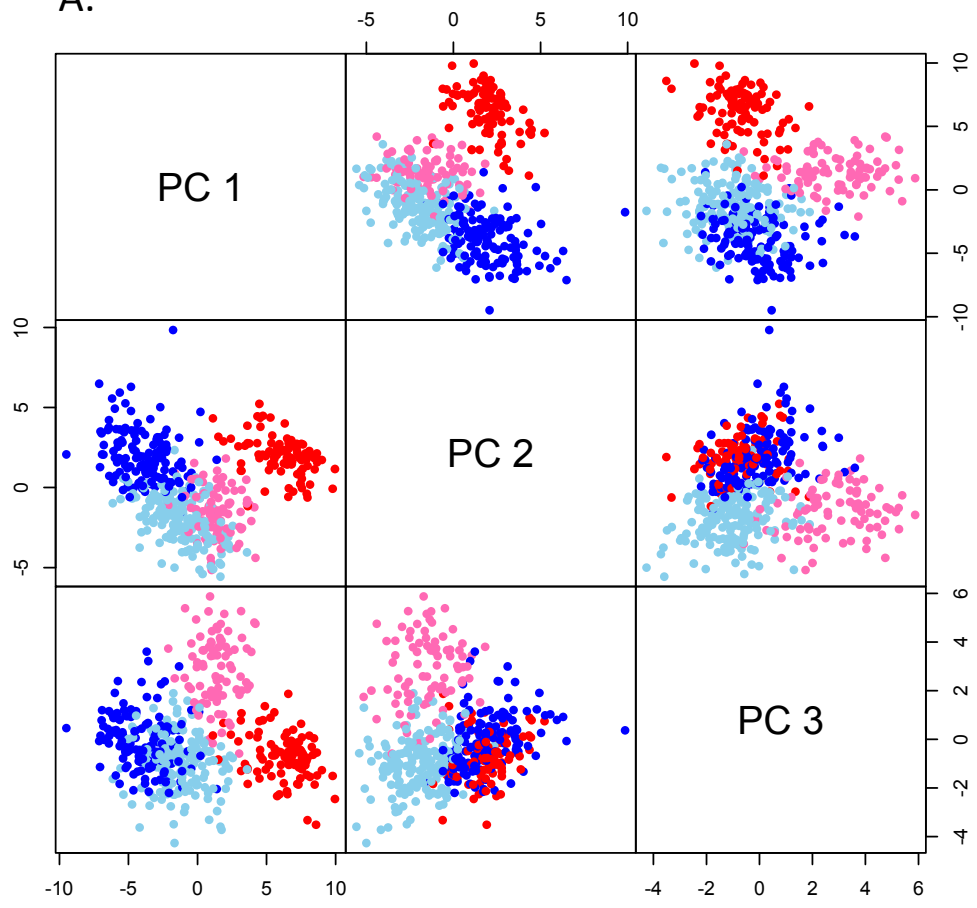

B.

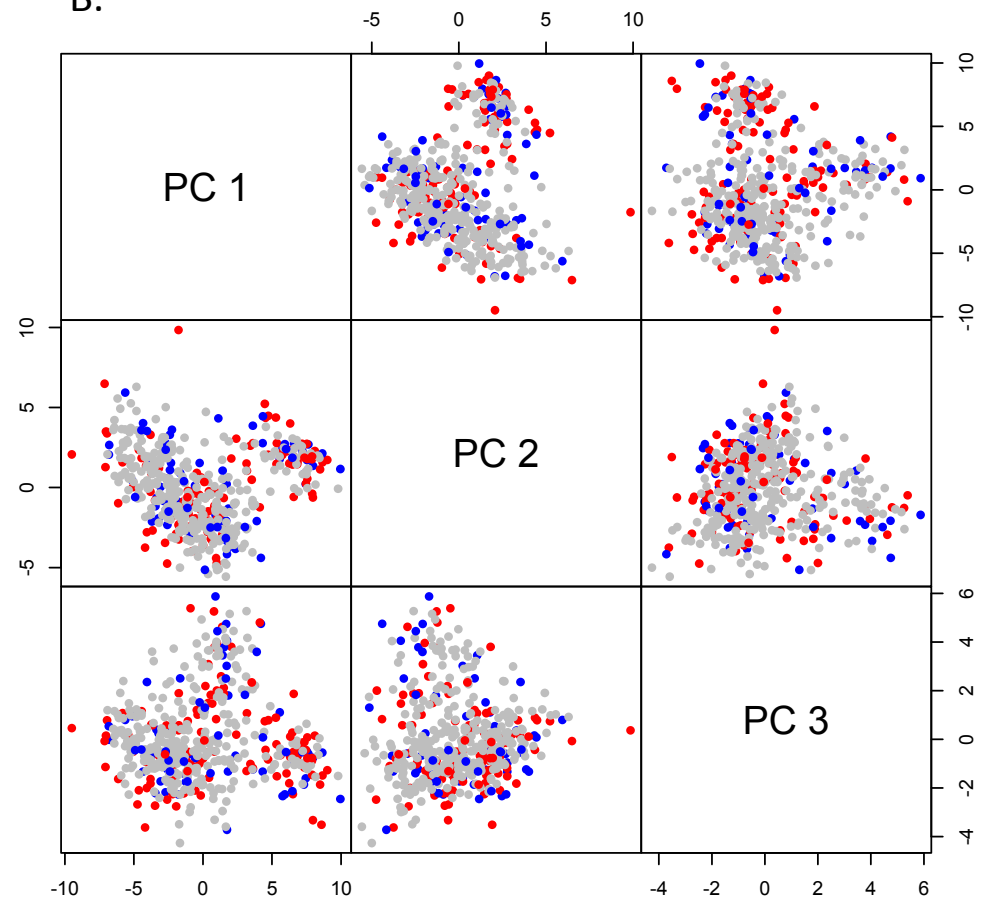

■ Basal-like    ■ HER2-enriched    ■ Luminal A    ■ Luminal B

■ UNC    ■ WashU    ■ BC no AST
